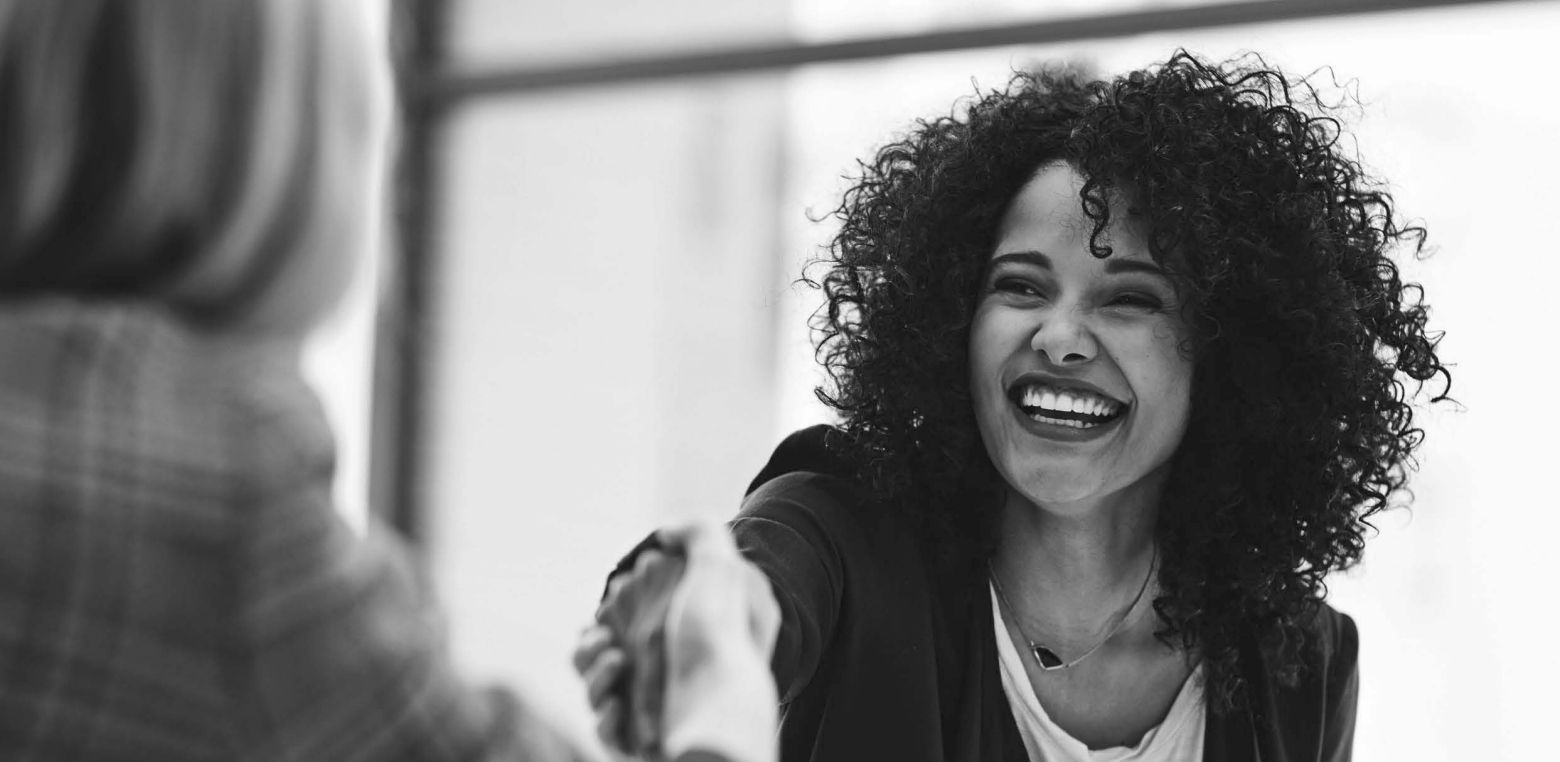

# Searching for the perfect psychiatric career?

## Let APA JobCentral help!

### Manage Your Career

- Browse hundreds of active job listings!
- Create an account to save jobs, store multiple resumes and cover letters and communicate with employers through our internal messaging system.
- Set up multiple job alerts specifying your skills, interests and location to receive e-mails when employers post jobs that match your criteria.

### Recruit for Open Positions

- Post your job in front of thousands of highly qualified psychiatrists.
- Cross promote your job listing in Psychiatric News.
- Search the anonymous resume database to find your ideal candidate.

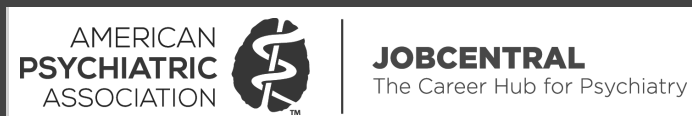

[jobs.psychiatry.org](http://jobs.psychiatry.org)

The American Psychiatric Association  
Publishing Textbook of Psychosomatic  
Medicine and Consultation-Liaison  
Psychiatry, Third Edition

Just  
Published!

Edited by James L. Levenson, M.D.

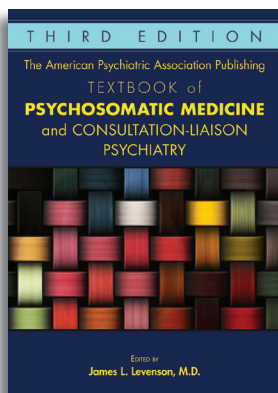

This book is an essential resource for psychiatry residents, psychosomatic medicine fellows, attending psychiatrists, and other specialists who need to stay up to date with the rapidly expanding evidence base in the field.

2019 • 1,594 pages • ISBN 978-1-61537-136-5 • Hardcover • \$225.00 • Item #37136  
2019 • 1,594 pages • ISBN 978-1-61537-199-0 • eBook • \$180.00 • Item #37199

AMERICAN  
PSYCHIATRIC  
ASSOCIATION  
PUBLISHING

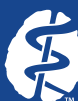

www.appi.org  
Email: appi@psych.org  
Phone: 1-800-368-5777

AH1840A

# Our Work Matters

Hope. Recovery. Wellbeing.

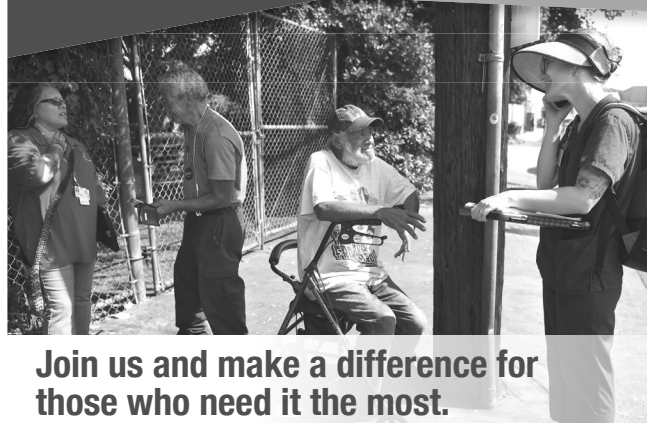

Join us and make a difference for  
those who need it the most.

Los Angeles County Department of Mental Health is a nationally recognized leader providing a wide range of services to one of the largest populations in the country. We invite you to join our team as we help the most vulnerable in our community find a path to independence and personal recovery.

Starting annual salary immediately post residency completion is **\$233,784** with **potential bonuses of \$32,000 annually**. Student loan repayment and recruitment incentives available.

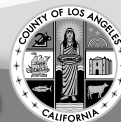

[www.psychiatristjobs.la](http://www.psychiatristjobs.la)

Visit [ps.psychiatryonline.org](http://ps.psychiatryonline.org) for these features!

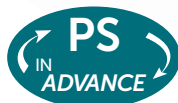

Discover the latest research before it appears in print

**Engaging Mothers With Depressive Symptoms in Care: Results of a Randomized Controlled Trial in Head Start**

**Dichotomies in the Development and Implementation of Digital Mental Health Tools**

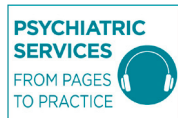

Listen to our podcast, *Psychiatric Services From Pages to Practice*, and learn about the latest mental health services research and why it is relevant.

**Episode 16:** racial and ethnic differences in treatment outcomes among participants in a randomized controlled trial of an intervention for first-episode psychosis; psychosis literacy among Latinos with first-episode psychosis and their caregivers; and recovery colleges, which involve supporting people living with mental health problems through adult education

Sign up (<http://appi.org/etocs>) to receive alerts as soon as new content is available.

AMERICAN  
PSYCHIATRIC  
ASSOCIATION  
PUBLISHING

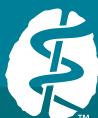

[ps.psychiatryonline.org](http://ps.psychiatryonline.org)

www.appi.org • 1-800-368-5777 • e-mail: appi@psych.org

Keep up with the latest from *Psychiatric Services* on Facebook ([facebook.com/PsychiatryOnline](https://facebook.com/PsychiatryOnline)) and Twitter (@APAPubPsychSvcs).

# The DSM-5 Collection

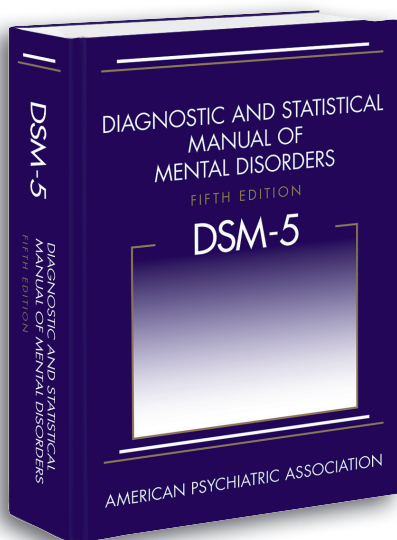

## Diagnostic and Statistical Manual of Mental Disorders, Fifth Edition (DSM-5®)

American Psychiatric Association

This new edition of *Diagnostic and Statistical Manual of Mental Disorders* (DSM-5®), used by clinicians and researchers to diagnose and classify mental disorders, is the product of more than 10 years of effort by hundreds of international experts in all aspects of mental health. Their dedication and hard work have yielded an authoritative volume that defines and classifies mental disorders in order to improve diagnosis, treatment, and research.

The criteria are concise and explicit, intended to facilitate an objective assessment of symptom presentations in a variety of clinical settings—inpatient, outpatient, partial hospital, consultation-liaison, clinical, private practice, and primary care.

- The latest findings in neuroimaging and genetics have been integrated into each disorder along with gender and cultural considerations.
- The revised organizational structure recognizes symptoms that span multiple diagnostic categories, providing new clinical insights in diagnosis.

- Both ICD-9-CM and ICD-10-CM codes are included for each disorder.

The *Diagnostic and Statistical Manual of Mental Disorders*, Fifth Edition, is the most comprehensive, current, and critical resource for clinical practice available to today's mental health professionals.

2013 • 991 pages • ISBN 978-0-89042-554-1 • Hardcover • \$210.00 • Item #2554

2013 • 991 pages • ISBN 978-0-89042-555-8 • Paperback • \$160.00 • Item #2555

2013 • 991 pages • ISBN 978-0-89042-557-2 • eBook • \$128.00 • Item #2557

**DSM-5**  
COLLECTION

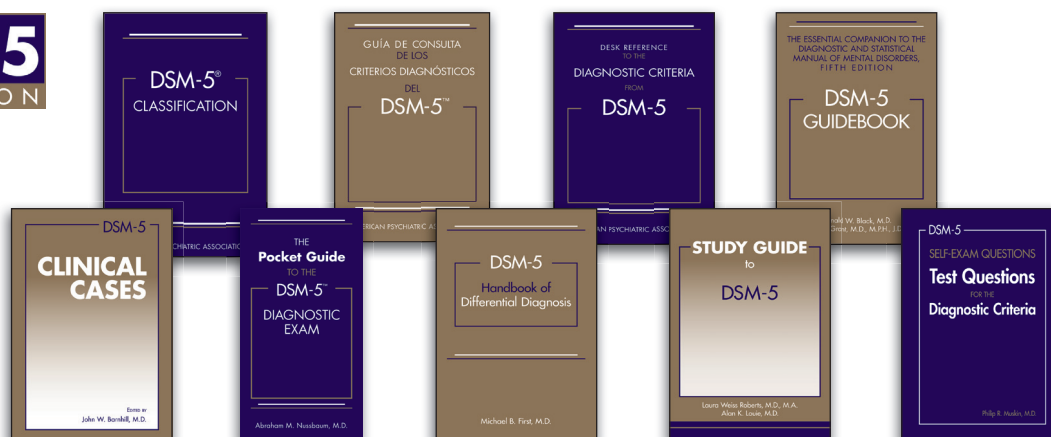

AMERICAN  
PSYCHIATRIC  
ASSOCIATION  
PUBLISHING

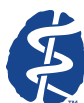

Order Online: [www.appi.org](http://www.appi.org)  
Phone: 703-907-7322  
Toll Free: 1-800-368-5777  
Email: [appi@psych.org](mailto:appi@psych.org)

20% Discount for American Psychiatric  
Association Members

25% Discount for APA Resident-Fellow Members

AH1842A
